# Supplementary material
Source: ML conference proceedings conference paper supplement (https://proceedings.neurips.cc/paper_files/paper/2022/hash/9b79416c0dc4b09feaa169ed5cdd63d4-Abstract.html)
Supplement: Supplementary file 1 [file 9b79416c0dc4b09feaa169ed5cdd63d4-Supplemental-Conference.pdf]

## 7 Appendix

### 7.1 Proof of Theorem 1

The Proof is based on [5, 16]. Before we prove the theorem, we need the following lemma.

**Lemma 1.** (*Bisla et al.*) *Let  $L(w)$  be  $\alpha$ -Lipschitz continuous. Let  $\delta$  be distributed according to the distribution  $p$ . Then,*

$$\begin{aligned} \|\nabla L_S(x) - \nabla L_S(y)\| &= \mathbb{E}_{\delta \sim p}[\nabla L_S(x + \delta) - \nabla L_S(y + \delta)] \\ &\leq \alpha \int |p(\delta - x) - p(\delta - y)| d\delta. \end{aligned} \quad (8)$$

Then we provide the proof of Theorem 1. We firstly illustrate that  $\nabla L_S(w)$  is  $\frac{\alpha}{\gamma}$ -Lipschitz continuous, and then demonstrate that  $\nabla L_S(w)$  is  $\beta$ -Lipschitz continuous. Finally, we can obtain that  $\nabla L_S(w)$  is  $\min\{\frac{\alpha}{\gamma}, \beta\}$ -Lipschitz continuous.

We can define  $\int |p(\delta - x) - p(\delta - y)| d\delta$  as:

$$\begin{aligned} &\int |p(\delta - x) - p(\delta - y)| d\delta \\ &= \int_{\delta: \|\delta - x\| \geq \|\delta - y\|} [p(\delta - x) - p(\delta - y)] d\delta + \int_{\delta: \|\delta - x\| \leq \|\delta - y\|} [p(\delta - y) - p(\delta - x)] d\delta \quad (9) \\ &= 2 \int_{\delta: \|\delta - x\| \leq \|\delta - y\|} [p(\delta - x) - p(\delta - y)] d\delta. \end{aligned}$$

We try to divide  $\int |p(\delta - x) - p(\delta - y)| d\delta$  into two different parts in the first equality. The second equality holds because they have the equal value when  $\|p(\delta - x)\| \geq \|p(\delta - y)\|$  and  $\|p(\delta - x)\| \leq \|p(\delta - y)\|$ .

Let  $\hat{\delta} = \delta - x$  for  $p(\delta - x)$  term and  $\hat{\delta} = \delta - y$  for  $p(\delta - y)$  term, we have:

$$\begin{aligned} &\int |p(\delta - x) - p(\delta - y)| d\delta \\ &= 2 \int_{\delta: \|\delta - x\| \leq \|\delta - y\|} p(\delta - x) d\delta - 2 \int_{\delta: \|\delta - x\| \leq \|\delta - y\|} p(\delta - y) d\delta \quad (10) \\ &= 2 \int_{\delta: \|\hat{\delta}\| \leq \|\hat{\delta} + (x - y)\|} p(\hat{\delta}) d\delta - 2 \int_{\delta: \|\hat{\delta}\| \geq \|\hat{\delta} - (x - y)\|} p(\hat{\delta}) d\delta \end{aligned}$$

We can rewrite Equation 10 as:

$$\begin{aligned} &\int |p(\delta - x) - p(\delta - y)| d\delta \\ &= 2\mathbb{P}_{\delta \sim p}(\|\delta\| \leq \|\delta + (x - y)\|) - 2\mathbb{P}_{\delta \sim p}(\|\delta\| \geq \|\delta - (x - y)\|). \end{aligned} \quad (11)$$

For the first part of the Equation 11, we can find:

$$\begin{aligned} &\mathbb{P}_{\delta \sim p}(\|\delta\| \leq \|\delta + (x - y)\|) \\ &= \mathbb{P}_{\delta \sim p}(\|\delta\|^2 \leq \|\delta + (x - y)\|^2) \\ &= \mathbb{P}_{\delta \sim p}(2\langle \delta, x - y \rangle \geq -\|x - y\|^2) \quad (12) \\ &= \mathbb{P}_{\delta \sim p}(2\langle \delta, \frac{x - y}{\|x - y\|} \rangle \geq -\|x - y\|). \end{aligned}$$

In addition,  $\frac{x-y}{\|x-y\|}$  has norm 1 and  $\delta \sim \mathbb{N}(0, \gamma^2 I)$  implies  $\langle \delta, \frac{x-y}{\|x-y\|} \rangle \sim \mathbb{N}(0, \gamma^2 I)$ . Therefore,

$$\begin{aligned}
& \mathbb{P}_{\delta \sim p}(\|\delta\| \leq \|\delta + (x-y)\|) \\
&= \mathbb{P}_{\delta \sim p}(\langle \delta, \frac{x-y}{\|x-y\|} \rangle \geq -\frac{\|x-y\|}{2}) \\
&= \int_{-\frac{\|x-y\|}{2}}^{+\infty} \frac{1}{\sqrt{2\pi\gamma^2}} \exp(-\frac{\hat{\delta}^2}{2\gamma^2}) d\hat{\delta}.
\end{aligned} \tag{13}$$

For the second part in Equation 11, we can obtain that:

$$\begin{aligned}
& \mathbb{P}_{\delta \sim p}(\|\delta\| \geq \|\delta - (x-y)\|) \\
&= \mathbb{P}_{\delta \sim p}(\|\delta\|^2 \geq \|\delta - (x-y)\|^2) \\
&= \mathbb{P}_{\delta \sim p}(2\langle \delta, x-y \rangle \geq \|x-y\|^2) \\
&= \mathbb{P}_{\delta \sim p}(2\langle \delta, \frac{x-y}{\|x-y\|} \rangle \geq \|x-y\|).
\end{aligned} \tag{14}$$

We can also get the similar distribution  $\langle \delta, \frac{x-y}{\|x-y\|} \rangle \sim \mathbb{N}(0, \gamma^2 I)$ . Therefore, we can find:

$$\begin{aligned}
& \mathbb{P}_{\delta \sim p}(\|\delta\| \geq \|\delta - (x-y)\|) \\
&= \mathbb{P}_{\delta \sim p}(\langle \delta, \frac{x-y}{\|x-y\|} \rangle \geq \frac{\|x-y\|}{2}) \\
&= \int_{\frac{\|x-y\|}{2}}^{+\infty} \frac{1}{\sqrt{2\pi\gamma^2}} \exp(-\frac{\hat{\delta}^2}{2\gamma^2}) d\hat{\delta}.
\end{aligned} \tag{15}$$

Then, we can combine Equation 13 and 15 to Equation 11:

$$\begin{aligned}
& \int |p(\delta-x) - p(\delta-y)| d\delta \\
&= 2 \int_{-\frac{\|x-y\|}{2}}^{+\infty} \frac{1}{\sqrt{2\pi\gamma^2}} \exp(-\frac{\hat{\delta}^2}{2\gamma^2}) d\hat{\delta} - 2 \int_{\frac{\|x-y\|}{2}}^{+\infty} \frac{1}{\sqrt{2\pi\gamma^2}} \exp(-\frac{\hat{\delta}^2}{2\gamma^2}) d\hat{\delta} \\
&= 2 \int_{-\frac{\|x-y\|}{2}}^{\frac{\|x-y\|}{2}} \frac{1}{\sqrt{2\pi\gamma^2}} \exp(-\frac{\hat{\delta}^2}{2\gamma^2}) d\hat{\delta} \\
&\leq \frac{\sqrt{2}\|x-y\|}{\gamma\sqrt{\pi}}
\end{aligned} \tag{16}$$

Therefore, we can combine Equation 8 and Equation 16:

$$\begin{aligned}
\|\nabla L_S(x) - \nabla L_S(y)\| &\leq \alpha \int |p(\delta-x) - p(\delta-y)| d\delta \\
&\leq \alpha \frac{\sqrt{2}\|x-y\|}{\gamma\sqrt{\pi}} \\
&\leq \frac{\alpha}{\gamma} \|x-y\|
\end{aligned} \tag{17}$$

Finally, we finish the proof of  $\frac{\alpha}{\gamma}$ -Lipschitz continuous for  $\nabla L_S(w)$ . Then, we try to show the proof of  $\beta$ -Lipschitz continuous for  $\nabla L_S(w)$ :

$$\begin{aligned}
\|\nabla L_S(x) - \nabla L_S(y)\| &= \|\nabla \mathbb{E}_{\delta \sim p}[L(x + \delta)] - \nabla \mathbb{E}_{\delta \sim p}[L(y + \delta)]\| \\
&= \|\mathbb{E}_{\delta \sim p}[\nabla L(x + \delta)] - \nabla L(y + \delta)\| \\
&= \left\| \int [\nabla L(x + \delta)] - \nabla L(y + \delta) p(\delta) d\delta \right\| \\
&\leq \int \|\nabla L(x + \delta) - \nabla L(y + \delta)\| p(\delta) d\delta \\
&\leq \int \beta \|(x + \delta) - (y + \delta)\| p(\delta) d\delta \\
&= \beta \|x - y\| \int p(\delta) d\delta \\
&= \beta \|x - y\|
\end{aligned} \tag{18}$$

Therefore, we can obtain  $\nabla L_S(w)$  is  $\beta$ -Lipschitz continuous.

Finally, we finish the proof that  $\nabla L_S(w)$  is  $\min\{\frac{\alpha}{\gamma}, \beta\}$ -Lipschitz continuous.

## 7.2 Compared with LPF-SGD

As shown in Table 1 and Table 2, we try to compare R-SAM with LPF-SGD on CIFAR-10 and CIFAR-100. In this section, we also try to compare R-SAM with LPF-SGD on ImageNet.

Table 5: Accuracy of ViT on ImageNet-1k for 300 epoch. The base optimizer for SAM and R-SAM is AdamW. Batch Size is 4096. We use Inception-style preprocessing method for input image.

| Model           | Resolution | AdamW | LPF-SGD | SAM  | R-SAM       |
|-----------------|------------|-------|---------|------|-------------|
| <b>ViT-B-16</b> | 224        | 74.7  | 75.9    | 79.8 | <b>80.7</b> |
| <b>ViT-S-16</b> | 224        | 74.9  | 75.8    | 77.9 | <b>78.7</b> |

## 7.3 The sensitivity Analysis of $\gamma$

In this section, we try to analyze the sensitivity of  $\gamma$  for R-SAM. The result is shown in Table 6.

Table 6: The sensitivity Analysis about  $\gamma$

| Model            | 2e-3 | 1.5e-3 | 1e-3 | 5e-4 | 1e-4 | 5e-5 |
|------------------|------|--------|------|------|------|------|
| <b>WRN-28-10</b> | 84.7 | 85.1   | 85.3 | 85.4 | 85.1 | 84.5 |
| <b>ViT-B-16</b>  | 79.7 | 80.2   | 80.7 | 80.7 | 80.4 | 79.7 |
| <b>ViT-S-16</b>  | 77.3 | 77.9   | 78.5 | 78.2 | 77.9 | 77.8 |

## 7.4 Hyperparameters

Table 7: Architectures of Vision Transformer

| Model    | Params | Patch Resolution | Sequence Length | Hidden Size | Heads | Layers |
|----------|--------|------------------|-----------------|-------------|-------|--------|
| ViT-B-16 | 87M    | 16 × 16          | 196             | 768         | 12    | 12     |
| ViT-S-16 | 22M    | 16 × 16          | 196             | 384         | 6     | 12     |

Table 8: Parameter Settings of ViT from Scratch on ImageNet

| <b>Model</b>     | <b>Input Resolution</b> | <b>Batch Size</b> | <b>Epoch</b> | <b>Warmup Steps</b> | <b>Peak LR</b> | <b>LR Decay</b> | <b>Optimizer</b> | $\rho$ | $\lambda$ | <b>Weight Decay</b> | <b>Gradient Clipping</b> |
|------------------|-------------------------|-------------------|--------------|---------------------|----------------|-----------------|------------------|--------|-----------|---------------------|--------------------------|
| ViT-B-16         | 224                     | 4096              | 300          | 10000               | 3e-3           | cosine          | AdamW            | /      | /         | 0.3                 | 1.0                      |
| ViT-S-16         | 224                     | 4096              | 300          | 10000               | 3e-3           | cosine          | AdamW            | /      | /         | 0.3                 | 1.0                      |
| ViT-B-16 + SAM   | 224                     | 4096              | 300          | 10000               | 3e-3           | cosine          | AdamW            | 0.18   | /         | 0.3                 | 1.0                      |
| ViT-S-16 + SAM   | 224                     | 4096              | 300          | 10000               | 3e-3           | cosine          | AdamW            | 0.1    | /         | 0.2                 | 1.0                      |
| ViT-B-16 + R-SAM | 224                     | 4096              | 300          | 10000               | 3e-3           | linear          | AdamW            | 1.4    | 2         | 0.3                 | 1.0                      |
| ViT-S-16 + R-SAM | 224                     | 4096              | 300          | 10000               | 3e-3           | linear          | AdamW            | 0.4    | 1         | 0.2                 | 1.0                      |
